# Supplementary material for: COVID-19 Vaccine Booster Hesitancy in Malaysia: A Web-Based Cross-Sectional Study
Source: Vaccines (Basel). 2023 Mar 13;11(3):638. doi: 10.3390/vaccines11030638 (PMC10058917; doi:10.3390/vaccines11030638)
Supplement: Supplementary file 1 [file vaccines-11-00638-s001.zip › vaccines-2232075-supplementary.pdf]

Table S1. Description of sections in the online survey on Second booster Hesitancy.

| Sections                                                                     | Details                                                                                                                                                                                       | Remarks                 |
|------------------------------------------------------------------------------|-----------------------------------------------------------------------------------------------------------------------------------------------------------------------------------------------|-------------------------|
| 1. Demographics                                                              | <ul style="list-style-type: none"> <li>• Age</li> <li>• Sex</li> <li>• Ethnicity</li> <li>• Education level</li> <li>• Area of Residence</li> <li>• State/Territories of Residence</li> </ul> |                         |
| 2. History of chronic disease                                                | <ul style="list-style-type: none"> <li>• Chronic diseases</li> <li>• On medication for chronic diseases</li> </ul>                                                                            |                         |
| 3. History of COVID-19 infection and hospitalization                         | <ul style="list-style-type: none"> <li>• Personal</li> <li>• Close friend and immediate family</li> </ul>                                                                                     |                         |
| 4. Adverse reaction experienced from Dose 1/2 of COVID-19 vaccine            | <ul style="list-style-type: none"> <li>• Personal</li> <li>• Close friend and immediate family</li> </ul>                                                                                     |                         |
| 5. Reasons for accepting Dose 1/2 of COVID-19 vaccine                        | <ul style="list-style-type: none"> <li>• 9 items</li> </ul>                                                                                                                                   | Self-formulating        |
| 6. Concerns after accepting Dose 1/2 of COVID-19 vaccine                     | <ul style="list-style-type: none"> <li>• 3 items</li> </ul>                                                                                                                                   | Self-formulating        |
| 7. Adverse reaction experienced from Dose 3 of COVID-19 vaccine              | <ul style="list-style-type: none"> <li>• Personal</li> <li>• Close friend and immediate family</li> </ul>                                                                                     |                         |
| 8. Reasons for accepting Dose 3 of COVID-19 vaccine                          | <ul style="list-style-type: none"> <li>• 9 items</li> </ul>                                                                                                                                   | Self-formulating        |
| 9. Concerns after accepting Dose 3 of COVID-19 vaccine                       | <ul style="list-style-type: none"> <li>• 4 items</li> </ul>                                                                                                                                   | Self-formulating        |
| 10. Status of Dose 4 of COVID-19 vaccine                                     | <ul style="list-style-type: none"> <li>• Preference of brand for dose 4</li> <li>• Reasons of accepting dose 4 (7 items)</li> <li>• Reasons of rejecting dose 4 (11 items)</li> </ul>         | Self-formulating        |
| 11. Subjective opinions (Positive, neutral, negative) and source of opinions | <ul style="list-style-type: none"> <li>• Government</li> <li>• Social media</li> <li>• Close friend and immediate family</li> </ul>                                                           | Self-formulating        |
| 12. Oxford COVID-19 Vaccine Hesitancy Scale                                  | <ul style="list-style-type: none"> <li>• 7 items</li> </ul>                                                                                                                                   | With minor modification |

Table S2: The frequency of endorsement for the 7 items of the Oxford COVID-19 Booster Hesitancy Scale (n=798).

| Oxford COVID-19 Booster Hesitancy Scale                                                                                                                                                                                                                 | 1<br>mark     | 2<br>marks    | 3<br>marks    | 4<br>marks    | 5<br>marks  |
|---------------------------------------------------------------------------------------------------------------------------------------------------------------------------------------------------------------------------------------------------------|---------------|---------------|---------------|---------------|-------------|
| 13. When the 4 <sup>th</sup> dose of COVID-19 vaccine was made available for registration in MySejahtera, I will<br><ul style="list-style-type: none"> <li>1 mark: definitely take it</li> <li>5 marks: definitely will not take it)</li> </ul>         | 250<br>(31.3) | 189<br>(23.7) | 231<br>(28.9) | 83<br>(10.4)  | 45<br>(5.6) |
| <ul style="list-style-type: none"> <li>When the 4<sup>th</sup> dose of COVID-19 vaccine is easily available (in walk-in vaccination centres, I</li> <li>1 mark: will get it as soon as possible</li> <li>5 marks: will refuse to get it</li> </ul>      | 180<br>(22.6) | 286<br>(35.8) | 191<br>(23.9) | 86<br>(10.8)  | 55<br>(6.9) |
| 14. I would describe my attitude towards receiving the 4 <sup>th</sup> dose of COVID-19 vaccine as<br><ul style="list-style-type: none"> <li>1 mark: very positive (supportive)</li> <li>5 marks: totally negative (against it)</li> </ul>              | 176<br>(22.1) | 189<br>(23.7) | 343<br>(43.0) | 61<br>(7.6)   | 29<br>(3.6) |
| 15. If the 4 <sup>th</sup> dose of COVID-19 vaccine was available at my local clinic, I would<br><ul style="list-style-type: none"> <li>1 mark: get it as soon as possible</li> <li>5 marks: never get it</li> </ul>                                    | 182<br>(22.8) | 337<br>(42.2) | 161<br>(20.2) | 73<br>(9.1)   | 45<br>(5.6) |
| 2. If my friends/family were thinking of getting 4 <sup>th</sup> dose of COVID-19 vaccine, I would<br><ul style="list-style-type: none"> <li>1 mark: strongly encourage them</li> <li>5 marks: suggest that they do not get the booster dose</li> </ul> | 140<br>(17.5) | 240<br>(30.1) | 349<br>(43.7) | 39<br>(4.9)   | 30<br>(3.8) |
| 3. I would describe myself as<br><ul style="list-style-type: none"> <li>1 mark: eager to get the 4<sup>th</sup> dose of COVID-19 vaccine</li> <li>5 marks: anti-booster for COVID-19</li> </ul>                                                         | 90<br>(11.3)  | 334<br>(41.9) | 256<br>(32.1) | 110<br>(13.8) | 8<br>(1.0)  |
| 4. Taking the 4 <sup>th</sup> dose of COVID-19 vaccine is<br><ul style="list-style-type: none"> <li>1 mark: absolutely important</li> <li>5 marks: absolutely not important</li> </ul>                                                                  | 111<br>(13.9) | 248<br>(31.1) | 351<br>(44.0) | 68<br>(8.5)   | 20<br>(2.5) |
| Note: Data was presented in n (%).                                                                                                                                                                                                                      |               |               |               |               |             |

Table S3: Summary of Findings on Factors associated with Intention towards the first booster of COVID-19 Vaccine.

| Study                  | Country   | Hesitancy rate, % | Predictors of hesitancy                                                                                                                                                                                                                                                                                                                                                                                                                                                                                                                                                                                                  |
|------------------------|-----------|-------------------|--------------------------------------------------------------------------------------------------------------------------------------------------------------------------------------------------------------------------------------------------------------------------------------------------------------------------------------------------------------------------------------------------------------------------------------------------------------------------------------------------------------------------------------------------------------------------------------------------------------------------|
| Yoshida et al., [4]    | Japan     | 2.1               | Factors associated with hesitancy:<br><ul style="list-style-type: none"> <li>Higher antibody level (AOR = 2.52; 95% CI: 1.27–4.99)</li> </ul>                                                                                                                                                                                                                                                                                                                                                                                                                                                                            |
| Wang et al., [5]       | China     | 6.5               | Factors associated with hesitancy:<br><ul style="list-style-type: none"> <li>Unemployment (adjusted odds ratio [AOR] 2.428, 95% CI: 1.590–3.670)</li> <li>Low monthly income (AOR 2.854, 95% CI: 1.561–5.281)</li> </ul>                                                                                                                                                                                                                                                                                                                                                                                                 |
| Tung et al., [6]       | China     | 8.9               | *Factors associated with acceptance:<br><ul style="list-style-type: none"> <li>Confidence in the safety of the COVID-19 vaccines (OR = 3.20)</li> <li>Confidence in the effectiveness of the COVID-19 vaccines against SARS-CoV-2 (OR = 2.25)</li> <li>Confidence in the effectiveness of the COVID-19 vaccine against its variants (useful versus [vs.] useless, OR = 2.33),</li> <li>Previous vaccine recipients (OR = 3.09)</li> </ul>                                                                                                                                                                                |
| Wu et al., [7]         | China     | 23.2              | Factors associated with hesitancy:<br><ul style="list-style-type: none"> <li>High perceived severity (adjusted odds ratio [AOR] = 0.69)</li> <li>Response cost (AOR = 0.47)</li> </ul> *Factors associated with acceptance<br><ul style="list-style-type: none"> <li>high perceived susceptibility (AOR = 1.19)</li> <li>Response efficacy (AOR = 2.13)</li> <li>Self-efficacy (AOR = 3.33)</li> </ul>                                                                                                                                                                                                                   |
| Lounis et al., [8]     | Algeria   | 23.8              | Factors associated with hesitancy:<br><ul style="list-style-type: none"> <li>Females</li> <li>Older age</li> <li>High school education</li> <li>Those with diabetes or hypertension</li> <li>With history of COVID-19 infection</li> </ul>                                                                                                                                                                                                                                                                                                                                                                               |
| Folcarelli et al., [9] | Italy     | 24.7              | Factors associated with hesitancy:<br><ul style="list-style-type: none"> <li>Older (ACSE: 1.03)</li> <li>Females (ACSE: 1.23)</li> <li>Staying alone (ACSE: -0.99)</li> <li>No need more additional information regarding the booster dose of the COVID-19 vaccine (ACSE: 0.46)</li> <li>Higher self-rated health status after second dose of COVID-19 vaccine (ACSE: 1.22)</li> <li>Having received information regarding the booster dose of the COVID-19 vaccine from official government organization (ACSE: 1.68)</li> <li>Having friends or family members who were diagnosed with COVID-19 (ACSE: 2.0)</li> </ul> |
| Rzyski et al., [10]    | Poland    | 29.0              | NA                                                                                                                                                                                                                                                                                                                                                                                                                                                                                                                                                                                                                       |
| Tan et al., [11]       | Singapore | 30.5              | Factors associated with hesitancy:<br><ul style="list-style-type: none"> <li>No formal education/Primary education (AOR: 0.109)</li> <li>Secondary education (AOR: 0.540)</li> <li>Perceived benefit (AOR 0.257)</li> <li>Necessity for booster vaccine (AOR: 0.547)</li> <li>Perceived concerns (AOR: 1.698)</li> <li>Perceived risk of COVI-19 (AOR:0.79)</li> </ul>                                                                                                                                                                                                                                                   |
| Yadete et al., [12]    | USA       | 38.2              | Factors associated with hesitancy:<br><ul style="list-style-type: none"> <li>Low functional literacy</li> <li>Low communicative literacy</li> <li>Low critical literacy</li> <li>High school education and below</li> </ul>                                                                                                                                                                                                                                                                                                                                                                                              |
| Batra et al., [13]     | USA       | 41.7              | Factors associated with hesitancy:<br><ul style="list-style-type: none"> <li>Low perceived advantages of vaccine</li> </ul>                                                                                                                                                                                                                                                                                                                                                                                                                                                                                              |

|                                                                                                                                                                 |             |      |                                                                                                                                                                                                                                                                                                                                                                                                                                                                                                                   |
|-----------------------------------------------------------------------------------------------------------------------------------------------------------------|-------------|------|-------------------------------------------------------------------------------------------------------------------------------------------------------------------------------------------------------------------------------------------------------------------------------------------------------------------------------------------------------------------------------------------------------------------------------------------------------------------------------------------------------------------|
|                                                                                                                                                                 |             |      | <ul style="list-style-type: none"> <li>• High perceived disadvantages of vaccine</li> <li>• Low behavior confidence</li> <li>• Low in adaptation to physical environment</li> </ul>                                                                                                                                                                                                                                                                                                                               |
| Achrekar et al., [14]                                                                                                                                           | India       | 44.1 | <p>Factors associated with hesitancy:</p> <ul style="list-style-type: none"> <li>• Older age</li> <li>• Male</li> <li>• High education</li> <li>• Rural</li> <li>• Living with vulnerable population</li> <li>• Family/friends tested positive COVID-19</li> <li>• Poor vaccine confidence</li> <li>• Poor vaccine literacy</li> </ul>                                                                                                                                                                            |
| Noh et al., [15]                                                                                                                                                | South Korea | 48.8 | <p>Factors associated with booster hesitancy:</p> <ul style="list-style-type: none"> <li>• Women (OR, 1.25; 95% CI, 1.05 to 1.50)</li> <li>• Younger people (OR, 1.44; 95% CI, 1.17 to 1.77)</li> <li>• Those with a lower education level (OR, 2.05; 95% CI, 1.10 to 3.82)</li> <li>• Those who received the mRNA-1273 vaccine type (OR, 2.01; 95% CI, 1.65 to 2.45)</li> <li>• Those who experienced serious adverse events following previous COVID-19 vaccination (OR, 2.03; 95% CI, 1.47 to 2.80)</li> </ul> |
| Al-Qerem et al., [16]                                                                                                                                           | Jordan      | 55.4 | <p>Factors associated with booster hesitancy</p> <ul style="list-style-type: none"> <li>• Had mild or no symptoms due to COVID-19 vaccine (AOR: 0.54)</li> <li>• I took it because of the imposed law, not because I believe it (AOR: 20.88)</li> <li>• I took it out of conviction and because of laws (AOR: 2.68)</li> <li>• Low Self-perceived risk (AOR: 1.7)</li> </ul>                                                                                                                                      |
| <p>Note: Factors associated with first booster acceptance.<br/> ACSE – Adjusted coefficient Standard errors<br/> AOR – Adjust odd ratio<br/> OR – odd ratio</p> |             |      |                                                                                                                                                                                                                                                                                                                                                                                                                                                                                                                   |
